# Supplementary material for: Tetrodotoxin, fungal pathogen infection, and bacterial microbiome associations are variable in the skin microecosystems of two Taricha newt species
Source: Frontiers journal article supplement (doi:10.3389/famrs.2024.1503056), 2025-01-28
Supplement: Table_2.xlsx [file Table_2.xlsx]

## Sheet: Sheet1
		Supplementary Table 2. Dunnett’s Post Hoc results of varying concentrations of tetrodotoxin on the growth of Batrachochytrium dendrobatidis (Bd) and B. salamandrivorans (Bd).
		Chytrid	Contrast	Estimate	SE	df	t.ratio	p.value
		Bd	250 - POS	6.659	7.43	41	0.896	0.906
			100 - POS	19.257	8.677	41	2.219	0.202
			50 - POS	3.669	7.921	41	0.463	0.991
			45 - POS	8.551	7.921	41	1.08	0.831
			40 - POS	-0.264	7.43	41	-0.036	1
			35 - POS	-7.716	7.43	41	-1.038	0.85
			30 - POS	-1.353	7.43	41	-0.182	1
			25 - POS	-2.774	7.43	41	-0.373	0.996
			20 - POS	1.051	7.43	41	0.141	1
			15 - POS	1.599	7.43	41	0.215	1
		Bsal	250 - POS	0.155	0.535	41	0.289	0.999
			100 - POS	-0.496	0.535	41	-0.928	0.895
			50 - POS	-1.485	0.598	41	-2.482	0.119
			45 - POS	0.426	0.598	41	0.712	0.957
			40 - POS	-0.897	0.655	41	-1.369	0.672
			35 - POS	-1.47	0.655	41	-2.243	0.193
			30 - POS	-0.742	0.598	41	-1.24	0.747
			25 - POS	-0.158	0.561	41	-0.282	0.999
			20 - POS	-0.335	0.561	41	-0.598	0.977
			15 - POS	-0.637	0.535	41	-1.19	0.775
